# Supplementary material for: Native CuA redox sites are largely resilient to pH variations within a physiological range
Source: Royal Society of Chemistry journal article supplement (doi:10.1039/c3cc40457a), 2013-01-01
Supplement: c3cc40457a.pdf [file c3cc40457a.pdf]

# Native Cu<sub>A</sub> Redox Sites are Largely Resilient to pH Variations within Physiological Range

Damián Alvarez-Paggi,<sup>a#</sup> Luciano A. Abriata,<sup>b#</sup> Daniel H. Murgida<sup>a,\*</sup> and Alejandro J. Vila<sup>b,\*</sup>

## Experimental procedures

*Protein Preparation.* Samples of wild type Cu<sub>A</sub> soluble fragments from subunit II of *T. thermophilus* cytochrome *c* oxidase *ba*<sub>3</sub> were produced as described elsewhere<sup>1</sup> based on the original protocol in described by Slutter *et al.*<sup>2</sup> Samples were stored in 100 mM phosphate buffer pH 6.0 with 100 mM KCl.

*Resonance Raman spectra.* Typical protein samples were 1 mM in a 10 mM phosphate, 500 mM KNO<sub>3</sub> buffer. HClO<sub>4</sub> was added to 200 μL of each protein solution in order to set the pH at the desired value. Equilibration was achieved after ca. 2 minutes after acid addition. Resonance Raman spectra were acquired in backscattering geometry by using a confocal microscope coupled to a single-stage spectrograph (Jobin Yvon XY 800) equipped with a liquid-nitrogen-cooled back-illuminated CCD detector. Elastic scattering was rejected with an edge filter (Semrock). The 514 nm line of a cw argon laser (Coherent Innova 70c) was focused into 100 μL protein solution films in a rotating quartz cell using a 20X objective (20.5 mm wd, 0.35 N.A.) Acquisitions were performed with laser powers of about 13mW at sample (30 s acquisition time) and a binning factor of 2, resulting in a spectral resolution of *c.a.* 4 cm<sup>-1</sup>. Spectra were acquired either at room temperature in rotating quartz cells or at 77 K using a Linkam THMS600 cryo-microscopy devise. After acquisition, spectra were processed with home-made software for baseline correction and peak determination.

*Electrochemical determinations.* Cyclic voltammetry was performed with a Gamry REF600 potentiostat in a home-made electrochemical cell equipped with a polycrystalline gold bead working electrode, a Pt wire auxiliary electrode and a Ag/AgCl (3.5 M KCl) reference electrode to which all potentials in this work are referred. Au gold beads of 1 mm diameter were first oxidized in 10% HClO<sub>4</sub> applying a 3 V potential for 2 minutes, sonicated in 10% HCl for 15 minutes, rinsed with water and subsequently treated with a 3:1 v/v H<sub>2</sub>O<sub>2</sub>:H<sub>2</sub>SO<sub>4</sub> mixture at 120 °C. The electrodes were then subjected to repetitive voltammetric cycles between -0.2 and 1.6 V in 10% HClO<sub>4</sub> and thoroughly washed with water and ethanol. Working electrodes were coated

with self-assembled monolayers (SAMs) by overnight incubation in an ethanolic 1mM HS-(CH<sub>2</sub>)<sub>6</sub>-OH solution to prevent protein adsorption. After thorough rinsing with ethanol and deionized water, the coated electrodes were placed in the electrochemical cell containing a 300 μM protein solution (in 10 mM phosphate buffer, KNO<sub>3</sub> 500mM, pH 7). The pH was adjusted by addition of HClO<sub>4</sub> or KOH, followed by 2 minutes of equilibration.

*Nuclear Magnetic Resonance Spectroscopy.* Samples for NMR experiments were prepared in TAPS buffer (Tris:HCl, sodium acetate and sodium phosphate, 50 mM each, plus 100 mM NaCl) with 10% D<sub>2</sub>O. NMR experiments were carried out on a Bruker Avance II Spectrometer operating at 600.13 MHz (<sup>1</sup>H frequency) at 25°C. Spectra were acquired with a triple-resonance (TXI) probehead using the PASE pulse sequence<sup>3</sup> on spectral windows of 48 – 360 kHz (total recycle times around 200 and 40 ms respectively).

*Optical spectroscopy.* Electronic absorption spectra were acquired with a Jasco V-670 spectrophotometer, which covers a wavelength range well beyond 1300 nm (but at longer wavelengths the absorption of water is too strong). Quartz cells were used with 1 cm or 0.1 cm path length as required.

### Supplementary Figures

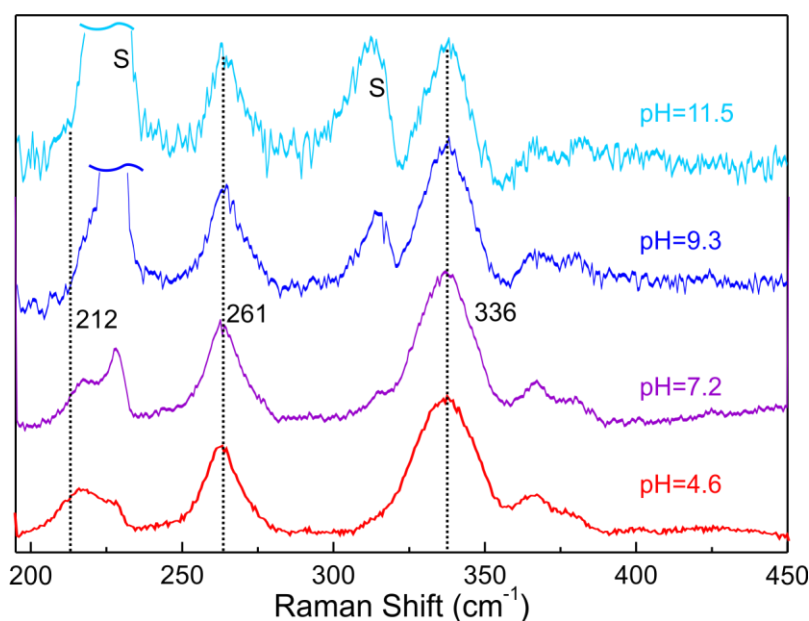

**Figure S1.** Resonance Raman spectra of the Tt-CuA site recorded at 77 K under 514 nm excitation. Peaks due to the solvent are labeled “S”.

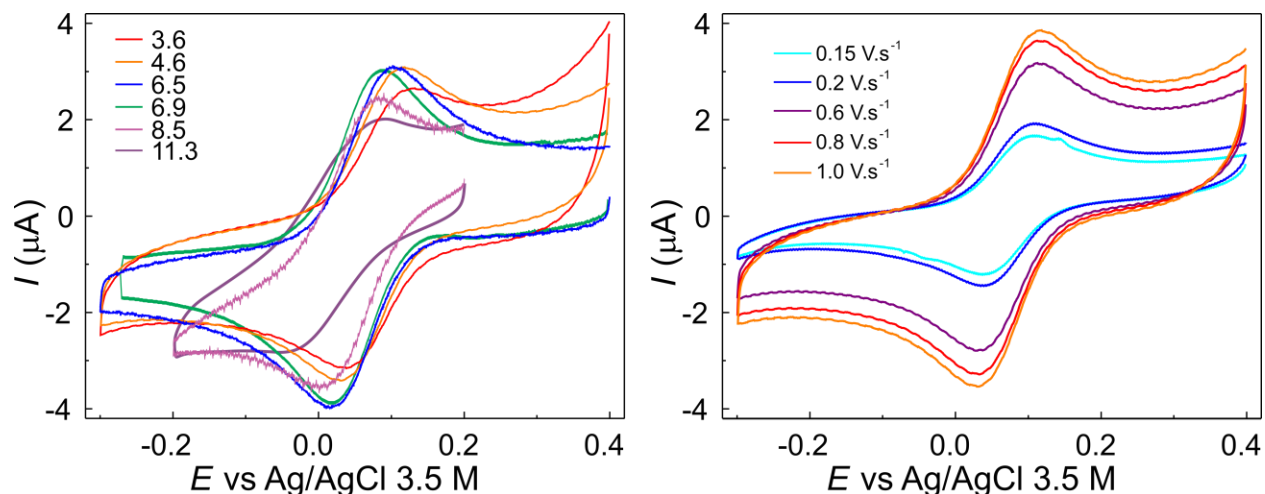

**Figure S2.** Left: CVs acquired at different pH values from 3.6 to 11.3 at a constant scan rate of  $0.6 \text{ V.s}^{-1}$ . Right: CVs acquired at pH 4.6 with variable scan rates from  $0.15 \text{ V.s}^{-1}$  to  $1.0 \text{ V.s}^{-1}$

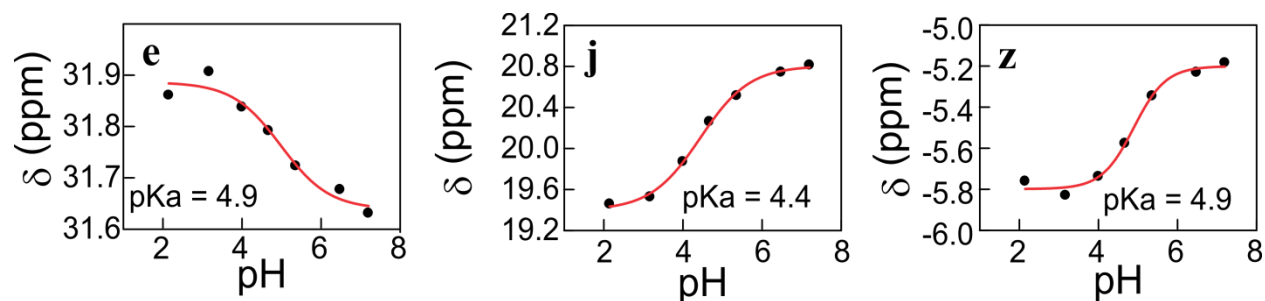

**Figure S3.** Positions of signals *e*, *j* and *z* of the  $^1\text{H}$  spectra in figure 1 at different pH values between 2.15 and 7.2, *i. e.* during the second transition as described in the article, in which the mixed valence nature of the center is preserved. An apparent  $\text{pK}_a$  of  $4.7 \pm 2$  is obtained from a global fit.

## References

- 1 Abriata, L. A.; Ledesma, G. N.; Pierattelli, R.; Vila, A. J., *J. Am. Chem. Soc.*, 2009, **131**, 1939.
- 2 Slutter, C. E.; Sanders, D.; Wittung, P.; Malmström, B. G.; Aasa, R.; Richards, J. H.; Gray, H. B.; James, A., *Biochemistry*, 1996, **35**, 3387.
- 3 Bondon, A.; Mouro, C. *J. Magn. Reson.*, 1998, **134**, 154.
